# Supplementary material
Source: Elsevier journal article supplement (http://library.osu.edu/sites/msa/suppmat/v236.i1.pp42-51/mmc2.pdf)
Supplement: mmc2 [file mmc2.pdf]

# $^{47}\text{Ti}^{35}\text{Cl}$ Assigned Transitions

Transitions are labeled using four columns, the excited state J value ( $J'$ ), the ground state J value ( $J''$ ), the observed transition wavenumber (Observed) and the fit residual multiplied by  $10^3$  (O-C).

| ${}^4\Gamma_{5/2} - X^4\Phi_{3/2} (0,0)$ |      |            |       |      |      |            |
|------------------------------------------|------|------------|-------|------|------|------------|
| J'                                       | J''  | Observed   | O-C   | J'   | J''  | Observed   |
| 9.5                                      | 8.5  | 23847.3367 | 6.6   | 30.5 | 29.5 | 23854.5256 |
| 10.5                                     | 9.5  | 23847.6674 | 3.1   | 31.5 | 30.5 | 23854.8816 |
| 11.5                                     | 10.5 | 23847.9992 | -0.1  | 10.5 | 11.5 | 23840.4945 |
| 12.5                                     | 11.5 | 23848.3335 | -1.6  | 11.5 | 12.5 | 23840.1822 |
| 13.5                                     | 12.5 | 23848.6608 | -10.9 | 12.5 | 13.5 | 23839.8654 |
| 15.5                                     | 14.5 | 23849.3461 | -1.2  | 13.5 | 14.5 | 23839.5482 |
| 16.5                                     | 15.5 | 23849.6840 | -2.4  | 14.5 | 15.5 | 23839.2356 |
| 17.5                                     | 16.5 | 23850.0294 | 3.1   | 15.5 | 16.5 | 23838.9253 |
| 18.5                                     | 17.5 | 23850.3700 | 2.9   | 16.5 | 17.5 | 23838.6106 |
| 19.5                                     | 18.5 | 23850.7154 | 6.6   | 17.5 | 18.5 | 23838.3031 |
| 20.5                                     | 19.5 | 23851.0500 | -1.3  | 18.5 | 19.5 | 23837.9938 |
| 21.5                                     | 20.5 | 23851.3925 | -2.2  | 19.5 | 20.5 | 23837.6777 |
| 22.5                                     | 21.5 | 23851.7367 | -2.3  | 20.5 | 21.5 | 23837.3783 |
| 23.5                                     | 22.5 | 23852.0828 | -1.5  | 21.5 | 22.5 | 23837.0662 |
| 24.5                                     | 23.5 | 23852.4309 | 0.5   | 22.5 | 23.5 | 23836.7618 |
| 25.5                                     | 24.5 | 23852.7777 | 0.2   | 23.5 | 24.5 | 23836.4545 |
| 26.5                                     | 25.5 | 23853.1271 | 1.6   | 24.5 | 25.5 | 23836.1508 |
| 27.5                                     | 26.5 | 23853.4760 | 1.5   | 25.5 | 26.5 | 23835.8491 |
| 28.5                                     | 27.5 | 23853.8235 | -1.0  | 26.5 | 27.5 | 23835.5500 |
| 29.5                                     | 28.5 | 23854.1756 | 0.1   | 27.5 | 28.5 | 23835.2445 |
